# Supplementary material for: A Selective Review of Cerebral Abnormalities in Patients With First-Episode Schizophrenia Before and After Treatment
Source: Atypon-hosted journal article supplement (doi:10.1176/appi.ajp.2015.15050641), 2015-12-01
Supplement: appi.ajp.2015.15050641.ds001.pdf [file appi.ajp.2015.15050641.ds001.pdf]

FIGURE S1. Flowchart of literature selection for anatomical and functional MRI studies in drug-naïve first episode schizophrenia before and after treatment.

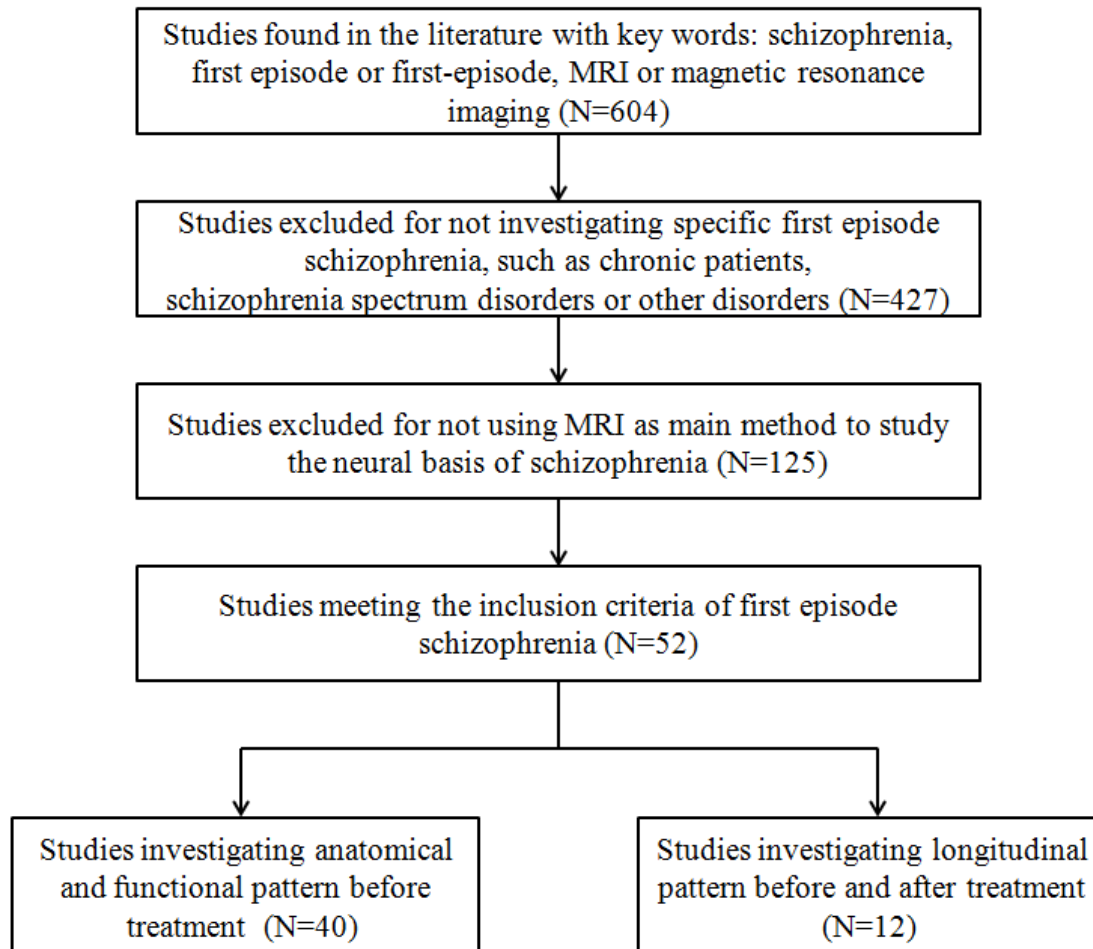

**TABLE S1. Main findings of structural and functional studies in FES before treatment**

| Author/Publication year | Number of subjects (male)       | Diagnostic criteria                                                            | Age (mean± S.D.)    | Illness duration | Education (years)    | Neuropsychological assessment | Imaging parameter (Tesla/thickness ) | Image methods  | Analysis methods | Main findings                                                                                                                                                                                                                                                                                                                                                                     | Methodological issues                                                            |
|-------------------------|---------------------------------|--------------------------------------------------------------------------------|---------------------|------------------|----------------------|-------------------------------|--------------------------------------|----------------|------------------|-----------------------------------------------------------------------------------------------------------------------------------------------------------------------------------------------------------------------------------------------------------------------------------------------------------------------------------------------------------------------------------|----------------------------------------------------------------------------------|
| Chua et al. /2007(1)    | 29 (12)<br>FES<br>40 (18)<br>HC | DSM-IV<br>schizophrenia,<br>schizophreniform<br>or brief psychotic<br>disorder | 32 ± 10<br>33 ± 8.1 | 120<br>days      | 10 ± 3.1<br>13 ± 3.2 | PANSS                         | 1.6/3                                | Structural MRI | VBM/ROI          | ↓ Global brain<br>volume ratios in<br>FES:<br>↓ GMV in FES:<br>bilateral<br>caudate nuclei<br>bilateral<br>cingulate gyri<br>bilateral<br>parahippocampal<br>gyri<br>bilateral<br>superior<br>temporal gyri<br>bilateral<br>cerebellum<br>right thalamus<br>right<br>prefrontal cortex.<br>↓ WMV in FES:<br>right anterior<br>limb of the<br>internal capsule<br>fronto-occipital | Older sample<br>Short illness<br>duration of patients<br>Only<br>cross-sectional |

|                            |                               |                         |                          |                         |                          |       |       |                |     |                                                                                                                                                                                                                                                                                                                                                            |            |
|----------------------------|-------------------------------|-------------------------|--------------------------|-------------------------|--------------------------|-------|-------|----------------|-----|------------------------------------------------------------------------------------------------------------------------------------------------------------------------------------------------------------------------------------------------------------------------------------------------------------------------------------------------------------|------------|
|                            |                               |                         |                          |                         |                          |       |       |                |     | fasciculus<br>bilateral<br>fornices<br>↑ CSF volume in<br>FES:<br>right lateral<br>ventricle                                                                                                                                                                                                                                                               |            |
| Jayakumar et al. /2005 (2) | 18 (9)<br>FES<br>18 (9)<br>HC | DSM-IV<br>schizophrenia | 24.9 ± 6.3<br>25.7 ± 7.5 | 10.3 ±<br>5.1<br>months | 10.9 ± 4.3<br>12.5 ± 2.5 | PANSS | 1.5/1 | Structural MRI | VBM | ↓ Global GM in<br>FES<br>↑ Global CSF<br>volumes in FES<br>↓ GMV in FES:<br>right superior<br>frontal gyrus<br>left inferior<br>frontal gyrus<br>left cingulate<br>left postcentral<br>gyrus<br>left superior<br>temporal gyrus<br>left inferior<br>parietal lobule<br>left insula<br>bilateral<br>caudate nuclei<br>bilateral<br>parahippocampal<br>gyrus | Not stated |

|                              |                                 |                            |                                    |                           |                                 |                      |         |                |         |                                                                                                                                                   |                                                                                                 |
|------------------------------|---------------------------------|----------------------------|------------------------------------|---------------------------|---------------------------------|----------------------|---------|----------------|---------|---------------------------------------------------------------------------------------------------------------------------------------------------|-------------------------------------------------------------------------------------------------|
|                              |                                 |                            |                                    |                           |                                 |                      |         |                |         | left thalamus<br>left cerebellum                                                                                                                  |                                                                                                 |
| Chen et al. / 2014<br>(3)    | 86 (46)<br>FES<br>86 (47)<br>HC | DSM-IV<br>schizophrenia    | 24.52 ±<br>0.91<br>25.03 ±<br>1.00 | 11.07 ±<br>2.26<br>months | 11.90 ± 0.33<br>13.01 ±<br>0.33 | PANSS                | 3.0/1   | Structural MRI | VBM/ROI | ↓ GMV in FES:<br>bilateral<br>hippocampus<br>left inferior<br>frontal gyrus<br>right thalamus                                                     | only connections<br>between ROIs<br>were examined                                               |
| Kim et al. / 2003<br>(4)     | 25 (25)<br>FES<br>25 (25)<br>HC | DSM-III-R<br>schizophrenia | 25.4 ± 6.5<br>25.3 ±<br>6.2        | Not<br>stated             | 13.1 ± 2.8<br>14.5 ± 2.0        | SANS                 | 1.5/1.5 | Structural MRI | ROI     | ↓ GMV in FES:<br>right posterior<br>superior<br>temporal gyrus                                                                                    | Not stated                                                                                      |
| Lacerda et al. /<br>2007 (5) | 43 (29)<br>FES<br>53 (24)<br>HC | DSM-IV<br>schizophrenia    | 24.52 ±<br>5.98 25.29<br>± 7.34    | Not<br>stated             | Not stated                      | BPRS<br>SANS<br>SAPS | 1.5/1.5 | Structural MRI | ROI     | ↑ GMV in FES:<br>left total<br>orbitofrontal<br>cortex and left<br>lateral<br>orbitofrontal<br>cortex                                             | Possibility of<br>inaccurate<br>anatomical<br>subdivision<br>Lack of replication<br>of findings |
| Guo et al. /2014 (6)         | 51 (33)<br>FES<br>41 (24)<br>HC | DSM-IV<br>schizophrenia    | 22.5 ± 4.1<br>22.8 ± 3.9           | 8.4 ±<br>6.8<br>months    | 11.4 ± 3.3<br>11.9 ± 2.7        | PANSS                | 3.0/1.1 | Structural MRI | VBM     | ↓ GMV in FES:<br>bilateral<br>hippocampal<br>gyri<br>right middle<br>temporal gyrus<br>left fusiform<br>gyrus<br>left orbital<br>inferior frontal | Small sample size<br>Cross-sectional<br>study                                                   |

|                                  |                                 |                                               |                                    |                           |                              |              |         |                |         |                                                                                                                                                                      |                                                                                               |
|----------------------------------|---------------------------------|-----------------------------------------------|------------------------------------|---------------------------|------------------------------|--------------|---------|----------------|---------|----------------------------------------------------------------------------------------------------------------------------------------------------------------------|-----------------------------------------------------------------------------------------------|
|                                  |                                 |                                               |                                    |                           |                              |              |         |                |         | gyrus                                                                                                                                                                |                                                                                               |
| Hu et al. /2013 (7)              | 51 (34)<br>FES<br>59 (38)<br>HC | DSM-IV<br>schizophrenia                       | 22.29 ±<br>3.95<br>23.20 ±<br>2.58 | 11.14 ±<br>6.40<br>months | 11.16 ± 2.34<br>12.14 ± 2.42 | PANSS        | 3.0/1.1 | Structural MRI | VBM     | ↓ GMV in FES:<br>bilateral<br>hippocampal<br>bilateral<br>parahippocampal<br>gyri<br>bilateral<br>middle temporal<br>gyri,<br>bilateral<br>superior<br>temporal gyri | Small sample size<br>Cross-sectional<br>study<br>VBM-related<br>methodological<br>limitations |
| Lui et al. / 2009 (8)            | 68 (30)<br>FES<br>68 (31)<br>HC | DSM-IV<br>schizophrenia                       | 24.2 ± 8.6<br>24.7 ± 8.8           | 8.6 ±<br>14.3<br>months   | 11.8 ± 3.2<br>13.0 ± 2.9     | PANSS<br>GAF | 3.0/1.0 | Structural MRI | VBM     | ↓ GMV in FES:<br>right superior<br>temporal gyrus<br>right middle<br>temporal gyrus<br>right anterior<br>cingulate gyrus                                             | VBM-related<br>methodological<br>limitations                                                  |
| Salgado-Pineda et al. / 2003 (9) | 13 (13)<br>FES<br>13 (13)<br>HC | DSM-IV<br>schizophrenia<br>(paranoid subtype) | 23.76 ±<br>5.65<br>23.36 ±<br>4.58 | Not<br>stated             | Not stated                   | BPRS         | 1.5/1   | Structural MRI | VBM/ROI | ↓ GM density in<br>FES:<br>bilateral<br>anterior cingulate<br>gyrus<br>left inferior<br>frontal<br>right<br>claustrum                                                | Not stated                                                                                    |

|                              |                               |                         |                          |               |            |       |              |                |     |                                                                                                                                                                                                                                                                                                                                 |                                                          |
|------------------------------|-------------------------------|-------------------------|--------------------------|---------------|------------|-------|--------------|----------------|-----|---------------------------------------------------------------------------------------------------------------------------------------------------------------------------------------------------------------------------------------------------------------------------------------------------------------------------------|----------------------------------------------------------|
|                              |                               |                         |                          |               |            |       |              |                |     | left pulvinar,<br>dorsomedial<br>bilateral thalamic<br>nuclei<br>caudate nuclei<br>left<br>hippocampus<br>left<br>parahippocampal<br>gyrus<br>↑ GM density in<br>FES:<br>left insula<br>left superior<br>temporal gyrus<br>left putamen<br>nucleus<br>right<br>supramarginal<br>gyrus<br>↓ GMV in FES:<br>bilateral<br>thalamus |                                                          |
| Okugawa et al./<br>2007 (10) | 14 (7)<br>FES<br>16 (8)<br>HC | DSM-IV<br>schizophrenia | 29.8 ± 6.3<br>29.8 ± 4.3 | Not<br>stated | Not stated | PANSS | 1.5/ (1.5/3) | Structural MRI | ROI | ↓ Volumes in<br>FES:<br>anterior<br>vermis<br>posterior<br>superior vermis                                                                                                                                                                                                                                                      | High onset age for<br>schizophrenia<br>Small sample size |

|                            |                                 |                                                                                                                                                                                             |                                    |                      |                                                              |                              |         |                |        |                                                       |                                                                                                                   |
|----------------------------|---------------------------------|---------------------------------------------------------------------------------------------------------------------------------------------------------------------------------------------|------------------------------------|----------------------|--------------------------------------------------------------|------------------------------|---------|----------------|--------|-------------------------------------------------------|-------------------------------------------------------------------------------------------------------------------|
| Joya et al. / 2002 (11)    | 18 (11)<br>FES<br>22 (14)<br>HC | DSM-III-R<br>schizophrenia or<br>schizoaffective<br>disorder                                                                                                                                | 28 ± 7<br>30 ± 8                   | 10 ± 9<br>months     | Not stated                                                   | PANSS                        | 1.5/1.5 | Structural MRI | ROI    | ↓ Bilateral<br>entorhinal<br>volumes in FES:          | Not stated                                                                                                        |
| Szeszko et al. / 2003 (12) | 24 (16)<br>FES<br>34 (21)<br>HC | Research<br>Diagnostic<br>Criteria for<br>schizophrenia or<br>schizoaffective<br>disorder or<br>DSM-IV<br>schizophrenia,<br>schizophreniform<br>disorder, or<br>schizoaffective<br>disorder | 25.4 ± 5.5<br>26.5 ± 6.8           | Not<br>stated        | 3.6 ± 0.8<br>2.8 ± 1.3<br>( Hollingshead-Redlich<br>system ) | SANS                         | 1.5/1.5 | Structural MRI | ROI    | ↓ Anterior<br>hippocampal<br>volume in FES            | Methodology<br>–related omission<br>of abnormalities<br>Possibility of<br>inaccurate<br>anatomical<br>subdivision |
| Joyal et al. / 2003 (13)   | 18 (11)<br>FES<br>22 (14)<br>HC | DSM-III-R<br>schizophrenia or<br>schizoaffective<br>disorder                                                                                                                                | 28 ± 7<br>30 ± 8                   | 10 ± 9<br>months     | Not stated                                                   | PANSS                        | 1.5/1.5 | Structural MRI | ROI    | ↓ Bilateral<br>amygdala<br>volumes in FES             | Not stated                                                                                                        |
| Rizos et al. / 2011 (14)   | 20 (8)<br>FES<br>20 (11)<br>HC  | Not stated                                                                                                                                                                                  | 30.75 ±<br>10.52<br>34 ± 4.70      | Not<br>stated        | 11.15 ± 2.92<br>12.61 ± 3.32                                 | PANSS                        | 1.5/3   | Structural MRI | ROI    | ↓ Hippocampus<br>volume in FES                        | Small sample size                                                                                                 |
| Shad et al. / 2006 (15)    | 14 (12)<br>FES<br>21 (15)<br>HC | DSM-IV<br>schizophrenia                                                                                                                                                                     | 26.23 ±<br>7.50<br>24.29 ±<br>5.73 | 104 ±<br>126<br>days | Not stated                                                   | BPRS<br>SANS<br>SAPS<br>SUMD | 1.5/1.5 | Structural MRI | ROI    | ↓ Dorsolateral<br>prefrontal cortex<br>volumes in FES | Small sample size                                                                                                 |
| Cahn et al. / 2002         | 20 (16)                         | DSM-IV                                                                                                                                                                                      | 27.6 ±                             | Not                  | 11.6 ± 3.0                                                   | PANSS                        | 1.5/1.2 | Structural MRI | Volume | ↑ Third ventricle                                     | Small sample size                                                                                                 |

|                              |                                 |                                                              |                                                                                  |                          |                            |            |         |                |        |                                          |                                                                                                         |
|------------------------------|---------------------------------|--------------------------------------------------------------|----------------------------------------------------------------------------------|--------------------------|----------------------------|------------|---------|----------------|--------|------------------------------------------|---------------------------------------------------------------------------------------------------------|
| (16)                         | FES<br>20 (16)<br>HC            | schizophrenia                                                | 6.43<br>27.2 ±<br>6.30                                                           | stated                   | 12.7 ± 3.0                 |            |         |                |        | volume in FES                            | No IQ testing<br>Different height<br>between groups                                                     |
| Chua et al. / 2003<br>(17)   | 19 (17)<br>FES<br>31 (24)<br>HC | DSM-IV<br>schizophrenia                                      | 31.6 ± 8.2<br>33.6 ± 7.6                                                         | 27.9 ±<br>27.7<br>months | Not stated                 | Not stated | 1.5/1.5 | Structural MRI | Volume | ↑ Lateral<br>ventricles<br>volume in FES | Use of neuroleptics<br>before scan                                                                      |
| Laakso et al. / 2001<br>(18) | 18 (11)<br>FES<br>22 (14)<br>HC | DSM-III-R<br>schizophrenia or<br>schizoaffective<br>disorder | 28 ± 7<br>30 ± 8                                                                 | 10 ± 9<br>months         | Not stated                 | PANSS      | 1.5/1.5 | Structural MRI | ROI    | N.S.                                     | Not stated                                                                                              |
| Molina et al. / 2004<br>(19) | 22 (14)<br>FES<br>44 (24)<br>HC | DSM-IV<br>schizophrenia                                      | 23.0 ± 3.5<br>29.4 ± 8.9                                                         | 0.6 ±<br>0.2<br>years    | 12.2 ± 0.7<br>12.1 ± 0.5   | PANSS      | 1.5/1.5 | Structural MRI | ROI    | N.S.                                     | Cross sectional<br>data collection<br>Different<br>proportion of<br>males and females<br>between groups |
| Prasad et al. / 2004<br>(20) | 33 (23)<br>FES<br>43 (21)<br>HC | DSM IV<br>psychotic disorders                                | M:24.84 ±<br>6.42<br>F:25.34 ±<br>7.73<br>M:24.28 ±<br>6.15<br>F:23.74 ±<br>8.75 | Not<br>stated            | 13.14 ± 2.8<br>15.65 ± 2.3 | BPRS       | 1.5/1.5 | Structural MRI | ROI    | N.S. in<br>parahippocampus<br>volumes    | Possibility of<br>inaccurate<br>anatomical<br>boundaries                                                |



|                           |                                         |                         |                                    |                           |                             |              |         |                                          |     |                                                                                                                                                                                                                                                                                                                                |                                                                                        |
|---------------------------|-----------------------------------------|-------------------------|------------------------------------|---------------------------|-----------------------------|--------------|---------|------------------------------------------|-----|--------------------------------------------------------------------------------------------------------------------------------------------------------------------------------------------------------------------------------------------------------------------------------------------------------------------------------|----------------------------------------------------------------------------------------|
| Yao et al. /2014<br>(12)  | 68 (30)<br>FES<br>68 (31)<br>HC         | DSM-IV<br>schizophrenia | 24.2 ± 8.6<br>24.7 ± 8.8           | 8.6 ±<br>14.3<br>months   | 11.8 ± 3.2<br>13.0 ± 2.9    | PANSS<br>GAF | 3.0/1.0 | Structural MRI                           | VBM | ↓ WMV in FES:<br>bilateral<br>posterior limb<br>of the internal<br>capsule<br>right subgyral<br>frontal white<br>matter                                                                                                                                                                                                        | Short illness<br>duration of patients<br>No direct evidence<br>of<br>neuropathogenesis |
| Ren et al. / 2013<br>(22) | 100<br>(41)<br>FES<br>100<br>(41)<br>HC | DSM-IV<br>schizophrenia | 24.30 ±<br>7.45<br>24.39 ±<br>7.58 | 6.25 ±<br>11.04<br>months | 12.32 ± 3.02<br>3.15 ± 2.45 | PANSS<br>GAF | 3.0/1.0 | Structural MRI/<br>Resting-state<br>fMRI | VBA | ↓ GMV in FES:<br>left<br>paracentral<br>left inferior<br>parietal lobules<br>↑ GMV in FES:<br>the left and<br>right thalamus<br>anterior<br>cingulate<br>cortex<br>insula, orbital<br>frontal gyrus<br>↓ ALFF in FES:<br>right inferior<br>left superior<br>frontal gyrus<br>bilateral<br>medial frontal<br>gyrus<br>bilateral | Not stated                                                                             |

|                        |                           |                      |                              |                        |                              |       |       |                                       |                          |                                                                                                                                                                                                                                                    |                                                                             |
|------------------------|---------------------------|----------------------|------------------------------|------------------------|------------------------------|-------|-------|---------------------------------------|--------------------------|----------------------------------------------------------------------------------------------------------------------------------------------------------------------------------------------------------------------------------------------------|-----------------------------------------------------------------------------|
|                        |                           |                      |                              |                        |                              |       |       |                                       |                          | inferior parietal lobule<br>bilateral precuneus<br>↑ ALFF in FES:<br>bilateral putamen<br>bilateral occipital regions                                                                                                                              |                                                                             |
| Guo et al. / 2014 (23) | 49 (30) FES<br>50 (23) HC | DSM-IV schizophrenia | 22.69 ± 4.62<br>23.48 ± 2.49 | 22.45 ± 6.71<br>months | 10.94 ± 2.40<br>11.46 ± 1.78 | PANSS | 3.0/4 | Structural MRI/<br>Resting-state fMRI | VBM/<br>network analysis | ↓ GMV in FES:<br>left medial prefrontal cortex<br>right anterior cingulate cortex<br>left superior temporal cortex<br>left inferior temporal gyrus<br>left fusiform gyrus, right lingual gyrus<br>↑ Driving effect in FES:<br>from the left medial | Cross-sectional study<br>No neuropsychological assessment<br>Only rest data |

|                           |                        |                                         |                         |                       |            |       |         |                |     |                                                                                                                                                                                                                                                                                                                                                          |            |
|---------------------------|------------------------|-----------------------------------------|-------------------------|-----------------------|------------|-------|---------|----------------|-----|----------------------------------------------------------------------------------------------------------------------------------------------------------------------------------------------------------------------------------------------------------------------------------------------------------------------------------------------------------|------------|
|                           |                        |                                         |                         |                       |            |       |         |                |     | <p>prefrontal cortex to the sensorimotor regions.</p> <p>↑ Driving effect in FES:</p> <p>from the right anterior cingulate cortex to the sensorimotor regions</p> <p>↓ Feedback in FES:</p> <p>from the sensorimotor regions to the right anterior cingulate cortex</p> <p>↑ and ↓ causal connectivity in FES:</p> <p>bilateral sensorimotor regions</p> |            |
| Prasad et al. / 2007 (24) | 30 (23) FES<br>44 (23) | DSM-IV schizophrenia or schizoaffective | 24.66 ± 7.71<br>24.90 ± | 2.32 ± 1.89<br>months | Not stated | PANSS | 1.5/1.5 | Structural MRI | VBM | ↓ GMV in HSV 1+ FES (compared to                                                                                                                                                                                                                                                                                                                         | Not stated |

|                         |                                       |                                                        |                                                     |                            |                          |                             |         |                |                        |                                                                                                                                                                                |                                                                      |
|-------------------------|---------------------------------------|--------------------------------------------------------|-----------------------------------------------------|----------------------------|--------------------------|-----------------------------|---------|----------------|------------------------|--------------------------------------------------------------------------------------------------------------------------------------------------------------------------------|----------------------------------------------------------------------|
|                         | HC                                    | disorder                                               | 6.8                                                 |                            |                          |                             |         |                |                        | herpes simplex virus 1- FES ):<br>Brodmann area 9<br>Brodmann area 32<br>↓ GMV in HSV 1+ FES (compared to herpes simplex virus 1- HC ):<br>Brodmann area 9<br>Brodmann area 32 |                                                                      |
| Xiang et al. /2013 (25) | 74 (30)<br>FES<br>55 (25)<br>HC       | DSM-IV<br>schizophrenia                                | 25 ± 8.3<br>25 ± 8.8                                | Not stated                 | 12.7 ± 2.9<br>12.4 ± 3.0 | BPRS<br>SANS<br>SAPS        | 3.0/1   | Structural MRI | Surface based analysis | ↑ Right inferior temporal surface area in pro-allele carriers of Ser307Pro polymorphism FES (compared to Ser/Ser carriers FES)                                                 | Not stated                                                           |
| Shad et al. / 2004 (26) | total: 35 (24)<br>poor sight: 17 (90) | DSM IV<br>schizophrenia or<br>schizoaffective disorder | total: 26.3 ± 7.0<br>poor sight: 26.13 ±6.7<br>good | Poor sight: 147 ± 159 days | Not stated               | BPRS<br>SANS<br>SAPS<br>GAF | 1.5/1.5 | Structural MRI | Volume                 | ↓ Right dorsolateral prefrontal cortex volume in poor insight FES                                                                                                              | Small sample size<br>Insight was assessed by single categorical item |

|                              |                                       |                         |                          |                                        |            |       |       |     |         |                                                                                                                                                                                                                                                                                                                                                                      |                                                                                                                                       |
|------------------------------|---------------------------------------|-------------------------|--------------------------|----------------------------------------|------------|-------|-------|-----|---------|----------------------------------------------------------------------------------------------------------------------------------------------------------------------------------------------------------------------------------------------------------------------------------------------------------------------------------------------------------------------|---------------------------------------------------------------------------------------------------------------------------------------|
|                              | good<br>sight:<br>18 (15)<br>0 HC     |                         | sight:25.36<br>± 7.83    | good<br>sight:<br>143 ±<br>287<br>days |            |       |       |     |         |                                                                                                                                                                                                                                                                                                                                                                      |                                                                                                                                       |
| Cheung et al. /<br>2008 (27) | 25<br>(13)<br>FES<br>26<br>(11)<br>HC | DSM-IV<br>schizophrenia | 28.5 ± 9.4<br>28.2 ± 9.2 | 180<br>days                            | Not stated | PANSS | 1.5/5 | DTI | VBA/ROI | ↓ FA in FES:<br>left<br>fronto-occipital<br>fasciculus<br>left inferior<br>longitudinal<br>fasciculus<br>white matter<br>adjacent to right<br>precuneus,<br>splenium of<br>corpus callosum<br>right posterior<br>limb of internal<br>capsule<br>white matter<br>adjacent to right<br>substantia nigra<br>left cerebral<br>peduncle<br>corpus<br>callosum<br>splenium | Between-group sex<br>difference<br>Thick and<br>non-contiguous<br>slices sequence<br>DTI voxel-based<br>methodological<br>limitations |
| Cheung et al. /2011          | 34 (17)                               | DSM-IV                  | 25.4 ± 7.5               | Not                                    | 6-18       | PANSS | 1.5/5 | DTI | VBA     | ↓ FA in FES:                                                                                                                                                                                                                                                                                                                                                         | No illness duration                                                                                                                   |

|                             |                                 |                                                |                              |                           |                                |       |       |                       |                                      |                                                                                                                            |                                                                                                                                                                   |                      |
|-----------------------------|---------------------------------|------------------------------------------------|------------------------------|---------------------------|--------------------------------|-------|-------|-----------------------|--------------------------------------|----------------------------------------------------------------------------------------------------------------------------|-------------------------------------------------------------------------------------------------------------------------------------------------------------------|----------------------|
| (28)                        | FES<br>32 (17)<br>HC            | schizophrenia                                  | 27.6 ± 8.5                   | stated                    | 6-18                           |       |       |                       |                                      |                                                                                                                            | right frontal lobe<br>left anterior cingulate gyrus<br>left superior temporal gyrus<br>right middle temporal gyrus<br>right middle cingulate gyrus<br>left cuneus | Thick slice sequence |
| Guo et al. / 2012<br>(29)   | 20 (9)<br>FES<br>26 (14)<br>HC  | DSM-IV<br>paranoid<br>schizophrenia            | 24 ± 4.86<br>23.62 ±<br>4.16 | 6.60 ±<br>3.10<br>months  | 13.25 ± 2.41<br>3.38 ± 2.53    | PANSS | 1.5/4 | DTI                   | Tract-based<br>spatial<br>statistics | ↓ FA in FES:<br>right superior longitudinal fasciculus<br>right fornix<br>right internal capsule<br>right external capsule | Small sample size<br>Only paranoid subtype<br>No neuropsychological testing                                                                                       |                      |
| Huang et al. / 2010<br>(30) | 66 (30)<br>FES<br>66 (30)<br>HC | DSM-IV<br>schizophrenia                        | 24.2 ± 8.4<br>24.5 ± 8.6     | 8.8 ±<br>14.1<br>months   | 11.5 ± 3.1<br>12.7 ± 2.5       | PANSS | 3.0/1 | Resting-state<br>fMRI | VBA                                  | ↓ ALFF in FES:<br>medial prefrontal lobe<br>↑ ALFF in FES:<br>left and right putamen                                       | The effects of physiological noise                                                                                                                                |                      |
| He et al. / 2012<br>(31)    | 104<br>(49)<br>FES              | DSM-IV<br>schizophrenia or<br>schizophreniform | 25.36 ±<br>8.26<br>26.61 ±   | 39.54 ±<br>31.88<br>weeks | 12.14 ± 3.061<br>12.74 ± 3.532 | PANSS | 3.0/5 | Resting-state<br>fMRI | VBA/<br>Network<br>analysis          | ↓ fALFF in FES :<br>bilateral<br>medial                                                                                    | Case-control design<br>Limited seeds and                                                                                                                          |                      |

|                        |                                 |                                     |                              |                        |                              |       |       |                       |                        |                                                                                                                                                                                                                   |                                                                                                                                     |
|------------------------|---------------------------------|-------------------------------------|------------------------------|------------------------|------------------------------|-------|-------|-----------------------|------------------------|-------------------------------------------------------------------------------------------------------------------------------------------------------------------------------------------------------------------|-------------------------------------------------------------------------------------------------------------------------------------|
|                        | 104<br>(50)<br>HC               | psychosis                           | 8.904                        |                        |                              |       |       |                       |                        | prefrontal cortex<br>orbitofrontal cortex<br>↑ fALFF in FES: bilateral putamen<br>↑ Functional connectivity with the default mode network in patients:<br>left insula<br>bilateral dorsolateral prefrontal cortex | methods in network analysis<br>Possible false anticorrelated results                                                                |
| Guo et al. / 2014 (32) | 49 (30)<br>FES<br>50 (23)<br>HC | DSM-IV<br>paranoid<br>schizophrenia | 22.69 ± 4.62<br>23.48 ± 2.49 | 22.45 ± 6.71<br>months | 10.94 ± 2.40<br>11.46 ± 1.78 | PANSS | 3.0/4 | Resting-state<br>fMRI | Functional<br>homotopy | ↓ VMHC in FES:<br>precuneus<br>precentral gyrus<br>superior temporal gyrus<br>middle occipital gyrus<br>fusiform gyrus/cerebellum lobule VI.                                                                      | The non-correlation between white matter/ gray matter abnormalities and findings<br>Lack of structural data<br>Cross-section design |
| Li et al. / 2015 (33)  | 26 (13)                         | DSM-IV                              | 14.51 ±                      | Not                    | Not stated                   | PANSS | 3.0/4 | Resting-state         | Functional             | ↓ VMHC values                                                                                                                                                                                                     | Small sample size                                                                                                                   |

|  |                      |               |                         |        |  |  |  |      |          |                                                                                                                                                                                                                                                                                                                                                                                                                                        |                                                                                                                                                                                            |
|--|----------------------|---------------|-------------------------|--------|--|--|--|------|----------|----------------------------------------------------------------------------------------------------------------------------------------------------------------------------------------------------------------------------------------------------------------------------------------------------------------------------------------------------------------------------------------------------------------------------------------|--------------------------------------------------------------------------------------------------------------------------------------------------------------------------------------------|
|  | FES<br>25 (13)<br>HC | schizophrenia | 1.94<br>14.37 ±<br>2.97 | stated |  |  |  | fMRI | homotopy | in early-onset<br>FES:<br>superior<br>temporal cortex<br>postcentral<br>gyrus<br>↓ intrinsic<br>functional<br>connectivity in<br>early-onset FES :<br>bilateral<br>postcentral gyrus<br>precentral<br>gyrus<br>supplemental<br>motor area<br>superior<br>temporal cortex<br>insula<br>↑ intrinsic<br>functional<br>connectivity in<br>early-onset FES :<br>bilateral<br>caudate<br>medial<br>prefrontal gyrus<br>thalamus<br>posterior | Cross-sectional<br>design<br>Unmatched age<br>range between<br>groups<br>No<br>neuropsychological<br>and<br>socioeconomic<br>status and IQ data<br>Voxel-wise method<br>related limitation |
|--|----------------------|---------------|-------------------------|--------|--|--|--|------|----------|----------------------------------------------------------------------------------------------------------------------------------------------------------------------------------------------------------------------------------------------------------------------------------------------------------------------------------------------------------------------------------------------------------------------------------------|--------------------------------------------------------------------------------------------------------------------------------------------------------------------------------------------|



|                                    |                                 |                         |                                    |               |                          |              |         |                       |                     |                                                                                                                                                                                                                                                                                                                                                                               |                                                                                                                                                                                                                                           |
|------------------------------------|---------------------------------|-------------------------|------------------------------------|---------------|--------------------------|--------------|---------|-----------------------|---------------------|-------------------------------------------------------------------------------------------------------------------------------------------------------------------------------------------------------------------------------------------------------------------------------------------------------------------------------------------------------------------------------|-------------------------------------------------------------------------------------------------------------------------------------------------------------------------------------------------------------------------------------------|
|                                    |                                 |                         |                                    |               |                          |              |         |                       |                     | cingulate cortex<br>precuneus                                                                                                                                                                                                                                                                                                                                                 |                                                                                                                                                                                                                                           |
| Yang et al. / 2014<br>(34)         | 26 (13)<br>FES<br>25 (13)<br>HC | DSM-IV<br>schizophrenia | 14.51 ±<br>1.94<br>14.37 ±<br>2.97 | Not<br>stated | Not stated               | PANSS        | 3.0/4   | Resting-state<br>fMRI | Network<br>analysis | An intrinsic<br>connectivity<br>network<br>associated with<br>diagnosis:<br>precuneus<br>bilateral<br>angular gyri.<br>An intrinsic<br>connectivity<br>network<br>associated with<br>multivariate<br>symptom<br>patterns:<br>left superior<br>temporal<br>gyrus,<br>right superior<br>temporal<br>gyrus<br>left inferior<br>frontal gyrus<br>right inferior<br>frontal gyrus. | Small sample size<br>Interpretation of<br>relative severity of<br>positive and<br>negative symptoms<br>is not well<br>established<br>The diagnoses on<br>the EOS patients<br>were not reached<br>employing a<br>standardized<br>interview |
| Scheuerecker et<br>al. / 2008 (35) | 23 (19)<br>FES (3)              | DSM-IV<br>schizophrenia | 31.6 ±<br>11.1                     | Not<br>stated | 10.3 ± 1.8<br>12.4 ± 1.3 | PANSS<br>CGI | 1.5/1.5 | Task-fMRI<br>(working | VBA                 | ↓ Activation in<br>FES:                                                                                                                                                                                                                                                                                                                                                       | Uncorrected<br>statistical threshold                                                                                                                                                                                                      |

|                               |                                 |                                                                    |                          |                       |                          |              |       |                            |     |                                                                                                                      |                                                                                                                                       |
|-------------------------------|---------------------------------|--------------------------------------------------------------------|--------------------------|-----------------------|--------------------------|--------------|-------|----------------------------|-----|----------------------------------------------------------------------------------------------------------------------|---------------------------------------------------------------------------------------------------------------------------------------|
|                               | washed out)<br>23 (19)<br>HC    |                                                                    | 32.6 ± 9.9               |                       |                          | BPRS<br>CGI  |       | memory)                    |     | right ventrolateral prefrontal cortex<br>↑ Activation in FES:<br>temporal regions                                    |                                                                                                                                       |
| van Veelen et al. / 2010 (36) | 30 (30)<br>FES<br>36 (36)<br>HC | DSM-IV schizophrenia, schizoaffective or schizophreniform disorder | 24.7 ± 4.2<br>24.3 ± 4.6 | 5.08 ± 0.84<br>months | 13.2 ± 2.4<br>11.7 ± 2.8 | PANSS<br>CGI | 1.5/4 | Task-fMRI (working memory) | ROI | ↓ Activation in FES:<br>left dorsolateral prefrontal cortex                                                          | Only male patients<br>Relative low severity of patients<br>Potential confounder on task performance                                   |
| Esslin et al. / 2012 (37)     | 27 (20)<br>FES<br>27 (20)<br>HC | DSM-IV schizophrenia, schizoaffective or delusional disorder       | 27.8 ± 7.4<br>27.1 ± 5.9 | Not stated            | 11.4 ± 1.8<br>11.8 ± 1.5 | PANSS<br>CGI | 1.5/4 | Task-fMRI (comprehensive)  | ROI | ↓ Activation in FES:<br>right ventral striatal                                                                       | Limited regarding patients' cooperation and the necessity treatment                                                                   |
| Braus et al. / 2002 (38)      | 12 (6)<br>FES<br>11 (6)<br>HC   | DSM-IV as well as ICD-10 schizophrenia                             | 25.1 ± 4.8<br>29.4 ± 6.2 | Not stated            | 10.6 ± 1.8<br>12.0 ± 1.4 | BPRS         | 1.5/3 | Task-fMRI (sensory)        | VBA | ↓ Activation in FES:<br>right thalamus<br>right prefrontal cortex<br>bilateral parietal lobe<br>↓ Activation in FES: | Small sample size<br>Patients were not examined for oculomotor and motion perception deficit or spatial and nonspatial working memory |

|                                                                                                                                                               |                                 |                                                                    |                              |                       |                              |              |       |                            |     |                                                                               |                                                                                     |
|---------------------------------------------------------------------------------------------------------------------------------------------------------------|---------------------------------|--------------------------------------------------------------------|------------------------------|-----------------------|------------------------------|--------------|-------|----------------------------|-----|-------------------------------------------------------------------------------|-------------------------------------------------------------------------------------|
|                                                                                                                                                               |                                 |                                                                    |                              |                       |                              |              |       |                            |     | left acoustic cortex.                                                         |                                                                                     |
| Ji et al. /2013 (39)                                                                                                                                          | 15 (9)<br>FES<br>15 (8)<br>HC   | DSM-IV paranoid schizophrenia                                      | 26.27 ± 7.24<br>24.73 ± 5.34 | 7.10 ± 6.4<br>months  | 9.00 ± 3.93<br>9.97 ± 2.31   | PANSS        | 1.5/6 | Task-fMRI (sensory gating) | ROI | ↓ Activation in FES: bilateral hippocampus bilateral thalamus                 | Small sample size<br>Low field MRI scanner<br>Liberal statistical threshold         |
| van Veelen et al. / 2011 (40)                                                                                                                                 | 35 (32)<br>FES<br>43 (39)<br>HC | DSM-IV schizophrenia, schizoaffective or schizophreniform disorder | 24.18 ± 4.24<br>24.08 ± 4.65 | 5.20 ± 4.32<br>months | 11.91 ± 2.86<br>13.05 ± 2.26 | PANSS<br>CGI | 1.5/4 | Task-fMRI (language)       | ROI | ↓ Lateralization index in FES: inferior frontal gyrus superior temporal gyrus | Small number of female patients<br>Performance data were obtained for limited tasks |
| <b>Most frequently reported brain regions in structural studies: cingulate gyrus; parahippocampal gyrus/ hippocampus; superior temporal gyrus; thalamus.</b>  |                                 |                                                                    |                              |                       |                              |              |       |                            |     |                                                                               |                                                                                     |
| <b>Most frequently reported brain regions in functional studies: medial prefrontal area; dorsolateral prefrontal area; thalamus; superior temporal gyrus.</b> |                                 |                                                                    |                              |                       |                              |              |       |                            |     |                                                                               |                                                                                     |

Abbreviations: FES: first episode schizophrenia. HC: healthy control. N.S.: no significant. GMV: grey matter volume. WMV: white matter volume. GM: grey matter. FA: fractional anisotropy. CSF: cerebrospinal fluid. ALFF: amplitude of low-frequency fluctuations. VMHC: voxel-mirrored homotopic connectivity. HSV: herpes simplex virus subtype. ↓ decreased. ↑ increased.

VBM: voxel-based morphometry. VBA: voxel-based analysis. ROI: region of interesting, CGI: Clinical Global Impressions, BPRS: Brief Psychiatric Rating Scale, PANSS: Positive and Negative Syndrome Scale

#### References

1. Chua SE, Cheung C, Cheung V, Tsang JT, Chen EY, Wong JC, et al. Cerebral grey, white matter and csf in never-medicated, first-episode schizophrenia. *Schizophrenia research*. 2007;89(1-3):12-21.
2. Jayakumar PN, Venkatasubramanian G, Gangadhar BN, Janakiramaiah N, Keshavan MS. Optimized voxel-based morphometry of gray matter volume in first-episode, antipsychotic-naive schizophrenia. *Progress in neuro-psychopharmacology & biological psychiatry*. 2005;29(4):587-91.
3. Chen Z, Deng W, Gong Q, Huang C, Jiang L, Li M, et al. Extensive brain structural network abnormality in first-episode treatment-naive patients with schizophrenia: morphometrical and covariation study. *Psychological medicine*. 2014;44(12):2489-501.

4. Kim JJ, Crespo-Facorro B, Andreasen NC, O'Leary DS, Magnotta V, Nopoulos P. Morphology of the lateral superior temporal gyrus in neuroleptic naive patients with schizophrenia: relationship to symptoms. *Schizophrenia research*. 2003;60(2-3):173-81.
5. Lacerda AL, Hardan AY, Yorbik O, Vemulapalli M, Prasad KM, Keshavan MS. Morphology of the orbitofrontal cortex in first-episode schizophrenia: relationship with negative symptomatology. *Progress in neuro-psychopharmacology & biological psychiatry*. 2007;31(2):510-6.
6. Guo X, Li J, Wang J, Fan X, Hu M, Shen Y, et al. Hippocampal and orbital inferior frontal gray matter volume abnormalities and cognitive deficit in treatment-naive, first-episode patients with schizophrenia. *Schizophrenia research*. 2014;152(2-3):339-43.
7. Hu M, Li J, Eyler L, Guo X, Wei Q, Tang J, et al. Decreased left middle temporal gyrus volume in antipsychotic drug-naive, first-episode schizophrenia patients and their healthy unaffected siblings. *Schizophrenia research*. 2013;144(1-3):37-42.
8. Lui S, Deng W, Huang X, Jiang L, Ma X, Chen H, et al. Association of cerebral deficits with clinical symptoms in antipsychotic-naive first-episode schizophrenia: an optimized voxel-based morphometry and resting state functional connectivity study. *The American journal of psychiatry*. 2009;166(2):196-205.
9. Salgado-Pineda P, Baeza I, Perez-Gomez M, Vendrell P, Junque C, Bargallo N, et al. Sustained attention impairment correlates to gray matter decreases in first episode neuroleptic-naive schizophrenic patients. *NeuroImage*. 2003;19(2 Pt 1):365-75.
10. Okugawa G, Nobuhara K, Takase K, Kinoshita T. Cerebellar posterior superior vermis and cognitive cluster scores in drug-naive patients with first-episode schizophrenia. *Neuropsychobiology*. 2007;56(4):216-9.
11. Joyal CC, Laakso MP, Tiihonen J, Syvalahti E, Vilkmann H, Laakso A, et al. A volumetric MRI study of the entorhinal cortex in first episode neuroleptic-naive schizophrenia. *Biological psychiatry*. 2002;51(12):1005-7.
12. Szeszko PR, Goldberg E, Gunduz-Bruce H, Ashtari M, Robinson D, Malhotra AK, et al. Smaller anterior hippocampal formation volume in antipsychotic-naive patients with first-episode schizophrenia. *The American journal of psychiatry*. 2003;160(12):2190-7.
13. Joyal CC, Laakso MP, Tiihonen J, Syvalahti E, Vilkmann H, Laakso A, et al. The amygdala and schizophrenia: a volumetric magnetic resonance imaging study in first-episode, neuroleptic-naive patients. *Biological psychiatry*. 2003;54(11):1302-4.
14. Rizos EN, Papathanasiou M, Michalopoulou PG, Mazioti A, Douzenis A, Kastania A, et al. Association of serum BDNF levels with hippocampal volumes in first psychotic episode drug-naive schizophrenic patients. *Schizophrenia research*. 2011;129(2-3):201-4.
15. Shad MU, Muddasani S, Keshavan MS. Prefrontal subregions and dimensions of insight in first-episode schizophrenia--a pilot study. *Psychiatry research*. 2006;146(1):35-42.
16. Cahn W, Hulshoff Pol HE, Bongers M, Schnack HG, Mandl RC, Van Haren NE, et al. Brain morphology in antipsychotic-naive schizophrenia: a study of multiple brain structures. *The British journal of psychiatry Supplement*. 2002;43:s66-72.
17. Chua SE, Lam IW, Tai KS, Cheung C, Tang WN, Chen EY, et al. Brain morphological abnormality in schizophrenia is independent of country of origin. *Acta psychiatrica Scandinavica*. 2003;108(4):269-75.
18. Laakso MP, Tiihonen J, Syvalahti E, Vilkmann H, Laakso A, Alakare B, et al. A morphometric MRI study of the hippocampus in first-episode, neuroleptic-naive schizophrenia. *Schizophrenia research*. 2001;50(1-2):3-7.
19. Molina V, Sanz J, Sarramea F, Benito C, Palomo T. Lower prefrontal gray matter volume in schizophrenia in chronic but not in first episode schizophrenia patients. *Psychiatry research*.

2004;131(1):45-56.

20. Prasad KM, Rohm BR, Keshavan MS. Parahippocampal gyrus in first episode psychotic disorders: a structural magnetic resonance imaging study. *Progress in neuro-psychopharmacology & biological psychiatry*. 2004;28(4):651-8.
21. Yao L, Lui S, Deng W, Wu M, Chen L, Xiao Y, et al. Association of white matter deficits with clinical symptoms in antipsychotic-naive first-episode schizophrenia: an optimized VBM study using 3T. *Magma (New York, NY)*. 2014;27(4):283-90.
22. Ren W, Lui S, Deng W, Li F, Li M, Huang X, et al. Anatomical and functional brain abnormalities in drug-naive first-episode schizophrenia. *The American journal of psychiatry*. 2013;170(11):1308-16.
23. Guo W, Liu F, Liu J, Yu L, Zhang J, Zhang Z, et al. Abnormal Causal Connectivity by Structural Deficits in First-Episode, Drug-Naive Schizophrenia at Rest. *Schizophrenia bulletin*. 2014.
24. Prasad KM, Shirts BH, Yolken RH, Keshavan MS, Nimgaonkar VL. Brain morphological changes associated with exposure to HSV1 in first-episode schizophrenia. *Molecular psychiatry*. 2007;12(1):105-13, 1.
25. Xiang B, Wu JY, Wang Q, Li ML, Jiang LJ, Deng W, et al. Cortical surface area correlates with STON2 gene Ser307Pro polymorphism in first-episode treatment-naive patients with schizophrenia. *PloS one*. 2013;8(6):e64090.
26. Shad MU, Muddasani S, Prasad K, Sweeney JA, Keshavan MS. Insight and prefrontal cortex in first-episode Schizophrenia. *NeuroImage*. 2004;22(3):1315-20.
27. Cheung V, Cheung C, McAlonan GM, Deng Y, Wong JG, Yip L, et al. A diffusion tensor imaging study of structural dysconnectivity in never-medicated, first-episode schizophrenia. *Psychological medicine*. 2008;38(6):877-85.
28. Cheung V, Chiu CP, Law CW, Cheung C, Hui CL, Chan KK, et al. Positive symptoms and white matter microstructure in never-medicated first episode schizophrenia. *Psychological medicine*. 2011;41(8):1709-19.
29. Guo W, Liu F, Liu Z, Gao K, Xiao C, Chen H, et al. first-episode, drug-naive paranoid schizophrenia. *Neuroscience letters*. 2012;531(1):5-9.
30. Huang XQ, Lui S, Deng W, Chan RC, Wu QZ, Jiang LJ, et al. Localization of cerebral functional deficits in treatment-naive, first-episode schizophrenia using resting-state fMRI. *NeuroImage*. 2010;49(4):2901-6.
31. He Z, Deng W, Li M, Chen Z, Jiang L, Wang Q, et al. Aberrant intrinsic brain activity and cognitive deficit in first-episode treatment-naive patients with schizophrenia. *Psychological medicine*. 2013;43(4):769-80.
32. Guo W, Xiao C, Liu G, Wooderson SC, Zhang Z, Zhang J, et al. Decreased resting-state interhemispheric coordination in first-episode, drug-naive paranoid schizophrenia. *Progress in neuro-psychopharmacology & biological psychiatry*. 2014;48:14-9.
33. Li HJ, Xu Y, Zhang KR, Hoptman MJ, Zuo XN. Homotopic connectivity in drug-naive, first-episode, early-onset schizophrenia. *Journal of child psychology and psychiatry, and allied disciplines*. 2014.
34. Yang Z, Xu Y, Xu T, Hoy CW, Handwerker DA, Chen G, et al. Brain network informed subject community detection in early-onset schizophrenia. *Scientific reports*. 2014;4:5549.
35. Scheuerecker J, Ufer S, Zipse M, Frodl T, Koutsouleris N, Zetzsche T, et al. Cerebral changes and cognitive dysfunctions in medication-free schizophrenia - an fMRI study. *Journal of psychiatric research*. 2008;42(6):469-76.
36. van Veelen NM, Vink M, Ramsey NF, Kahn RS. Left dorsolateral prefrontal cortex dysfunction in medication-naive schizophrenia. *Schizophrenia research*. 2010;123(1):22-9.

37. Esslinger C, Englisch S, Inta D, Rausch F, Schirmbeck F, Mier D, et al. Ventral striatal activation during attribution of stimulus saliency and reward anticipation is correlated in unmedicated first episode schizophrenia patients. *Schizophrenia research*. 2012;140(1-3):114-21.
38. Braus DF, Weber-Fahr W, Tost H, Ruf M, Henn FA. Sensory information processing in neuroleptic-naive first-episode schizophrenic patients: a functional magnetic resonance imaging study. *Archives of general psychiatry*. 2002;59(8):696-701.
39. Ji B, Mei W, Zhang JX, Jing J, Wu Q, Zhuo Y, et al. Abnormal auditory sensory gating-out in first-episode and never-medicated paranoid schizophrenia patients: an fMRI study. *Experimental brain research*. 2013;229(2):139-47.
40. van Veelen NM, Vink M, Ramsey NF, Sommer IE, van Buuren M, Hoogendam JM, et al. Reduced language lateralization in first-episode medication-naive schizophrenia. *Schizophrenia research*. 2011;127(1-3):195-201.

**TABLE S2. Main findings of longitudinal structural and functional studies in FES before and after treatment**

| Author/<br>Publication<br>year | Number<br>(male)                                                            | Diagnostic<br>criteria                                    | Age<br>(mean<br>±S.D.)                                   | Illness<br>duration      | Educati<br>on<br>(years) | Imaging<br>parameter<br>(Tesla/<br>thickness) | Image methods  | Analysis<br>methods | Following<br>time  | Types of<br>medicine | Pretreatment<br>main<br>findings<br>(compare to<br>HC): | Posttreatment<br>main findings                                                                                                                                  | Methodological<br>issues                                                                                                     |
|--------------------------------|-----------------------------------------------------------------------------|-----------------------------------------------------------|----------------------------------------------------------|--------------------------|--------------------------|-----------------------------------------------|----------------|---------------------|--------------------|----------------------|---------------------------------------------------------|-----------------------------------------------------------------------------------------------------------------------------------------------------------------|------------------------------------------------------------------------------------------------------------------------------|
| Prasad et al. /<br>2005 (1)    | FES:<br>27 baseline<br>25 (17) at 1<br>year<br>19 (13) at 2<br>year<br>0 HC | DSM-IV<br>schizophrenia or<br>schizoaffective<br>disorder | 1 year:<br>25.36 ±<br>7.84<br>2 year:<br>26.69 ±<br>8.04 | Not<br>stated            | Not<br>stated            | 1.5/1.5                                       | Structural MRI | ROI                 | 1year /<br>2years  | Not stated           | Not stated                                              | GMV of the<br>total and left<br>dorsolateral<br>prefrontal<br>cortex at<br>baseline<br>predicted<br>functional<br>outcome in<br>FES at 1 but<br>not at 2 years. | Small sample<br>size<br>Short duration<br>of follow-up<br>Only<br>dorsolateral<br>prefrontal cortex<br>were examined         |
| Rizos et al. /<br>2014 (2)     | 14 (8) FES<br>0 HC                                                          | DSM-IV<br>schizophrenia                                   | 29.71 ±<br>10.21                                         | 8.00 ±<br>4.60<br>months | 13.00<br>± 3.65          | 1.5/3                                         | Structural MRI | ROI                 | 8 months           | SGAs                 | Not stated                                              | ↓ Left<br>hippocamp<br>al volume<br>in FES<br>(compare to<br>pretreatmen<br>t)                                                                                  | Small sample<br>size<br>Indirect<br>measurement<br>of brain<br>BDNF levels<br>Both<br>proBDNF and<br>BDNF were<br>recognized |
| Ebdrup et al. /<br>2011 (3)    | 22 (15) FES<br>28 (21) HC                                                   | DSM-IV<br>schizophrenia                                   | 26.2 ±<br>5.4                                            | Not<br>stated            | Not<br>stated            | 3.0/Not<br>stated                             | Structural MRI | ROI/Volume          | FES:<br>7.3 ± 1.0m | SGAs                 | ↓ Volume in<br>caudate                                  | Progressive<br>bilateral                                                                                                                                        | Considerable<br>attrition during                                                                                             |

|                            |                           |                                                    |                              |                     |                                          |          |                |                          |                       |                                    |                         |                                                                                                                 |                                                                                            |
|----------------------------|---------------------------|----------------------------------------------------|------------------------------|---------------------|------------------------------------------|----------|----------------|--------------------------|-----------------------|------------------------------------|-------------------------|-----------------------------------------------------------------------------------------------------------------|--------------------------------------------------------------------------------------------|
|                            |                           |                                                    | 28.4 ± 6.0                   |                     |                                          |          |                |                          | HC:<br>7.7 ± 2.3m     |                                    | nucleus and hippocampus | striatal and hippocampal volume loss in FES                                                                     | the 6-month Potential type II error in subgroups comparison. Liberal statistical threshold |
| Li et al./ 2012 (4)        | 40 (23) FES<br>23 (14) HC | DSM-IV schizophrenia or schizophreniform psychosis | 24.05 ± 7.75<br>22.49 ± 5.83 | 9.33 ± 12.72 months | 12.50 ± 2.94<br>12.80 ± 3.42             | 3.0/1    | Structural MRI | Tensor-based morphometry | 6 weeks               | Conventional antipsychotics / SGAs | Not stated              | ↑ Right putamen GMV in FES (difference maps versus HCs' difference maps)                                        | Low ratio of follow-up Different type of antipsychotics                                    |
| Theberge et al. / 2014 (5) | 16 (14) FES<br>16 (14) HC | DSM-IV schizophrenia or schizophreniform psychosis | 25 ± 8<br>29 ± 12            | 96 ± 108 weeks      | 11-13 (10 or less)<br>14-16 (10 or less) | 4.0/2.75 | Structural MRI | VBM                      | 10 months / 30 months | Conventional antipsychotics / SGAs | N.S.                    | ↓ GMV in left precuneus at 10 months (compare to pretreatment)<br>↓ GMV in left precuneus (expanded to frontal, | Small sample size                                                                          |



|                         |                           |                                                   |                              |                    |            |                                                             |                |         |         |            |            |                                                                                             |                                                                                                                                                                                  |
|-------------------------|---------------------------|---------------------------------------------------|------------------------------|--------------------|------------|-------------------------------------------------------------|----------------|---------|---------|------------|------------|---------------------------------------------------------------------------------------------|----------------------------------------------------------------------------------------------------------------------------------------------------------------------------------|
|                         |                           |                                                   |                              |                    |            |                                                             |                |         |         |            |            | temporal, parietal and limbic lobes) at 30 months (compare to pretreatment)                 |                                                                                                                                                                                  |
| Prasad et al./ 2011 (6) | 26 (17) FES<br>38 (21) HC | DSM-IV schizophrenia or schizoaffective disorder  | 23.59 ± 7.82<br>23.05 ± 4.85 | 2.12 ± 2.26 months | Not stated | 1.5/1.5                                                     | Structural MRI | VBM/ROI | 1 year  | Not stated | Not stated | ↓ GMV in posterior cingulate gyrus in HSV1+ FES (compare to pretreatment) N.S. in HSV1- FES | Differences in medications between the exposed and unexposed patients Potential practice effects All subjects evaluated at baseline were not available for follow-up evaluations |
| Mané et al. / 2009 (7)  | 15 (12) FES<br>11 (8) HC  | DSM-IV schizophreniform disorder or schizophrenia | 25.56 ± 5.77<br>30.31 ± 4.36 | 5.78 ± 5.55 months | Not stated | 1.5/1.5<br>DSM-IV schizophreniform disorder or schizophreni | Structural MRI | VBM     | 4 years | SGAs       | Not stated | ↓ GMV in FES (difference maps versus HCs'                                                   | Small sample size Cannabis use of patients                                                                                                                                       |

|                        |                           |                         |                              |                       |                              |       |     |     |         |                                    |                                                                                                                            |                                                                                                                           |                                                                                                                                                    |
|------------------------|---------------------------|-------------------------|------------------------------|-----------------------|------------------------------|-------|-----|-----|---------|------------------------------------|----------------------------------------------------------------------------------------------------------------------------|---------------------------------------------------------------------------------------------------------------------------|----------------------------------------------------------------------------------------------------------------------------------------------------|
|                        |                           |                         |                              |                       |                              | a     |     |     |         |                                    |                                                                                                                            | difference maps):<br>left superior temporal gyrus<br>right orbitofrontal gyrus<br>bilateral lingual gyrus<br>right cuneus |                                                                                                                                                    |
| Wang et al. / 2013 (8) | 35 (16) FES<br>22 (14) HC | DSM-IV<br>schizophrenia | 23.84 ± 6.96<br>22.41 ± 5.96 | 7.26 ± 5.32<br>months | 12.37 ± 3.11<br>12.84 ± 3.41 | 3.0/3 | DTI | VBA | 6 weeks | Conventional antipsychotics / SGAs | ↓ FA in FES around the right posterior cingulate gyrus ( extend to the right anterior corona and radiata precentral gyrus) | ↓ FA in FES (compare to HC):<br>bilateral anterior cingulate gyrus<br>right anterior corona radiata of the frontal lobe   | Undetected subtle abnormalities<br>Small sample size<br>Possibility of incorrect statistic approach<br>Uncertain underlying pathological mechanism |

|                               |                           |                                                            |                                |                         |                                |         |                              |                          |         |      |                                                 |                                                                                                                                                                                                                                                                                                                   |                                                                                                                                                              |
|-------------------------------|---------------------------|------------------------------------------------------------|--------------------------------|-------------------------|--------------------------------|---------|------------------------------|--------------------------|---------|------|-------------------------------------------------|-------------------------------------------------------------------------------------------------------------------------------------------------------------------------------------------------------------------------------------------------------------------------------------------------------------------|--------------------------------------------------------------------------------------------------------------------------------------------------------------|
| Lui et al. / 2011<br>(9)      | 34 (13) FES<br>34 (13) HC | DSM-IV<br>schizophrenia                                    | 24.6 ±<br>8.5<br>25.0 ±<br>8.0 | 7.8 ±<br>12.4<br>months | 12.1 ±<br>3.0<br>13.4 ±<br>2.8 | 3.0/5   | Resting-state<br>fMRI        | VBA/ Network<br>analysis | 6 weeks | SGAs | Not stated                                      | ↑ ALFF in<br>FES (compare<br>to<br>pretreatment):<br>right<br>inferior<br>parietal lobule<br>left<br>superior<br>parietal lobule<br>bilateral<br>medial frontal<br>cortex<br>right<br>inferior<br>frontal gyrus<br>left<br>superior<br>frontal gyrus<br>left<br>superior<br>temporal<br>gyrus<br>right<br>caudate | The influence of<br>physiological<br>noise cannot be<br>rule out<br>completely<br>Lack of<br>consensus about<br>the exact<br>physiological<br>nature of ALFF |
| Nielsen et al. /<br>2012 (10) | 23 (16) FES<br>24 (20) HC | ICD-10<br>schizophrenia or<br>schizoaffective<br>psychoses | 26.0 ±<br>6.7<br>25.7 ±<br>5.9 | Not<br>stated           | 11.5 ±<br>2.3<br>15.3 ±<br>2.6 | 3.0/2.4 | Task-fMRI<br>(comprehensive) | VBM/ROI                  | 6 weeks | SGAs | ↓ Activation<br>in FES:<br>bilateral<br>ventral | N.S. (compare<br>to HC)                                                                                                                                                                                                                                                                                           | Previous drug<br>abuse and<br>current<br>occasional drug                                                                                                     |

|                               |                                                 |                                                                                                                                                                                                      |                                |                     |                                |       |                                                     |     |                      |      |                                                               |                                                                                                                                    |                                                                                                                                         |
|-------------------------------|-------------------------------------------------|------------------------------------------------------------------------------------------------------------------------------------------------------------------------------------------------------|--------------------------------|---------------------|--------------------------------|-------|-----------------------------------------------------|-----|----------------------|------|---------------------------------------------------------------|------------------------------------------------------------------------------------------------------------------------------------|-----------------------------------------------------------------------------------------------------------------------------------------|
|                               |                                                 |                                                                                                                                                                                                      |                                |                     |                                |       |                                                     |     |                      |      | striatum                                                      |                                                                                                                                    | use in patients<br>Smoking<br>chronicity was<br>not assessed                                                                            |
| Goghari et al. /<br>2013 (11) | 19 (11) FES<br>26 (17) HC                       | DSM-IV<br>schizophrenia,<br>schizoaffective<br>disorder,<br>schizophreniform<br>disorder,<br>psychosis not<br>otherwise<br>specified, and<br>major depressive<br>disorder with<br>psychotic features | 18.9 ±<br>3.6<br>20.9 ±<br>2.1 | Not<br>stated       | 11.4 ±<br>2.7<br>14.3 ±<br>1.8 | 3.0/1 | Structural MRI<br>/Task-fMRI<br>(working<br>memory) | ROI | 4 weeks / 8<br>weeks | SGAs | N.S. in<br>middle<br>frontal<br>thickness                     | N.S. (compare<br>to HC in 4<br>weeks)<br>↑ Rostral<br>middle<br>frontal<br>thickness in<br>FES<br>(compare to<br>HC in 9<br>weeks) | Small sample<br>size<br>Sample was not<br>matched for age<br>Consisted of<br>patients on<br>different kind<br>and dose of<br>medication |
| Veelen et al.<br>(12)         | 23 (not<br>stated) FES<br>33 (not<br>stated) HC | DSM-IV<br>schizophreniform<br>disorder or<br>schizophrenia                                                                                                                                           | 25.3 ±<br>4.6<br>24.5 ±<br>4.7 | 4.9 ± 4.4<br>months | 11.2 ±<br>2.7<br>13.2 ±<br>2.4 | 1.5/4 | Task-fMRI<br>(working<br>memory)                    | ROI | 10.1 ± 2.2<br>weeks  | SGAs | ↓ Activation<br>in FES:<br>dorsolateral<br>prefrontal<br>lobe | N.S. in<br>dorsolateral<br>prefrontal<br>lobe<br>(compare to<br>HC)                                                                | Short follow up<br>time<br>Only male<br>patients<br>Different kind of<br>medication                                                     |

Abbreviations: FES: first episode schizophrenia. HC: healthy control. N.S.: no significant. GMV: grey matter volume. GM: grey matter. FA: fractional anisotropy. HSV: herpes simplex virus subtype. BDNF: Brain Derived Neurotrophic Factor. SGAs: second-generation antipsychotics. ALFF: amplitude of low frequency fluctuations. ↓ decreased. ↑ increased.

#### References

1. Prasad KM, Sahni SD, Rohm BR, Keshavan MS. Dorsolateral prefrontal cortex morphology and short-term outcome in first-episode schizophrenia. *Psychiatry research*.

2005;140(2):147-55.

2. Rizos E, Papathanasiou MA, Michalopoulou PG, Laskos E, Mazioti A, Kastania A, et al. A longitudinal study of alterations of hippocampal volumes and serum BDNF levels in association to atypical antipsychotics in a sample of first-episode patients with schizophrenia. *PloS one*. 2014;9(2):e87997.
3. Ebdrup BH, Skimminge A, Rasmussen H, Aggernaes B, Oranje B, Lublin H, et al. Progressive striatal and hippocampal volume loss in initially antipsychotic-naive, first-episode schizophrenia patients treated with quetiapine: relationship to dose and symptoms. *The international journal of neuropsychopharmacology / official scientific journal of the Collegium Internationale Neuropsychopharmacologicum (CINP)*. 2011;14(1):69-82.
4. Li M, Chen Z, Deng W, He Z, Wang Q, Jiang L, et al. Volume increases in putamen associated with positive symptom reduction in previously drug-naive schizophrenia after 6 weeks antipsychotic treatment. *Psychological medicine*. 2012;42(7):1475-83.
5. Theberge J, Williamson KE, Aoyama N, Drost DJ, Manchanda R, Malla AK, et al. Longitudinal grey-matter and glutamatergic losses in first-episode schizophrenia. *The British journal of psychiatry : the journal of mental science*. 2007;191:325-34.
6. Prasad KM, Eack SM, Goradia D, Pancholi KM, Keshavan MS, Yolken RH, et al. Progressive gray matter loss and changes in cognitive functioning associated with exposure to herpes simplex virus 1 in schizophrenia: a longitudinal study. *The American journal of psychiatry*. 2011;168(8):822-30.
7. Mane A, Falcon C, Mateos JJ, Fernandez-Egea E, Horga G, Lomena F, et al. Progressive gray matter changes in first episode schizophrenia: a 4-year longitudinal magnetic resonance study using VBM. *Schizophrenia research*. 2009;114(1-3):136-43.
8. Wang Q, Cheung C, Deng W, Li M, Huang C, Ma X, et al. White-matter microstructure in previously drug-naive patients with schizophrenia after 6 weeks of treatment. *Psychological medicine*. 2013;43(11):2301-9.
9. Lui S, Li T, Deng W, Jiang L, Wu Q, Tang H, et al. Short-term effects of antipsychotic treatment on cerebral function in drug-naive first-episode schizophrenia revealed by "resting state" functional magnetic resonance imaging. *Archives of general psychiatry*. 2010;67(8):783-92.
10. Nielsen MO, Rostrup E, Wulff S, Bak N, Broberg BV, Lublin H, et al. Improvement of brain reward abnormalities by antipsychotic monotherapy in schizophrenia. *Archives of general psychiatry*. 2012;69(12):1195-204.
11. Goghari VM, Smith GN, Honer WG, Kopala LC, Thornton AE, Su W, et al. Effects of eight weeks of atypical antipsychotic treatment on middle frontal thickness in drug-naive first-episode psychosis patients. *Schizophrenia research*. 2013;149(1-3):149-55.
12. van Veelen NM, Vink M, Ramsey NF, van Buuren M, Hoogendam JM, Kahn RS. Prefrontal lobe dysfunction predicts treatment response in medication-naive first-episode schizophrenia. *Schizophrenia research*. 2011;129(2-3):156-62.
